# Supplementary material for: An NMR-based scoring function improves the accuracy of binding pose predictions by docking by two orders of magnitude
Source: PubMed Central journal article supplement — J Biomol NMR. 2011 Dec 14;52(1):23–30. doi: 10.1007/s10858-011-9590-5 (PMC3266494; doi:10.1007/s10858-011-9590-5), 2011-12-14
Supplement: 10858_2011_9590_MOESM1_ESM.pdf [file 10858_2011_9590_MOESM1_ESM.pdf]

**An NMR-based scoring function improves the accuracy of binding pose predictions by docking by two orders of magnitude.**

Julien Orts<sup>a</sup>, Stefan Bartoschek<sup>b</sup>, Christian Griesinger<sup>c</sup>, Peter Monecke<sup>d</sup>, Teresa Carlomagno<sup>a\*</sup>

<sup>a</sup> EMBL, Structure and Computational Biology Unit, Meyerhofstrasse 1, D-69117 Heidelberg, Germany

<sup>b</sup> Sanofi-Aventis Deutschland GmbH, R&D LGCR/Parallel Synthesis & Natural Products, Industriepark Hoechst, Bldg. H811, D-65926 Frankfurt am Main, Germany

<sup>c</sup> Max Planck Institute for Biophysical Chemistry, Am Fassberg 11, D-37077 Göttingen, Germany

<sup>d</sup> Sanofi-Aventis Deutschland GmbH, R&D LGCR/Structure, Design & Informatics, Industriepark Hoechst, Bldg. G838, D-65926 Frankfurt am Main, Germany

\* Corresponding author:

Teresa Carlomagno, EMBL, Structure and Computational Biology Unit, Meyerhofstrasse 1, D-69117 Heidelberg, Germany, Tel.: +49-6221-387 8552; Fax: +49-6221-387 8519; E.mail: [teresa.carlomagno@embl.de](mailto:teresa.carlomagno@embl.de)

## Supporting Information

**Descriptors of similarity of relative binding modes.** The agreement between the relative binding mode of  $L_1$  and  $L_2$  in each pair of docked complex structures with respect to the relative binding mode observed in the crystallographic structures 3DNE.pdb and 3DND.pdb is characterized by descriptors based on quaternions. RMSD calculations are impracticable due to the large number of complex pairs. Unit quaternions provide a convenient mathematical tool for representing orientations and rotations of objects in three dimensions. Compared to Euler angles they are simpler to use and bypass the problem of gimbal lock. Compared to rotation matrices, they are numerically more stable and more efficient in computation. For each transformation of a rigid body in a three-dimensional space, there exists a unique corresponding quaternion. Quaternions can be thought of as a vector, representing the axis of rotation, and an angle, representing the rotation.

Quaternions allow the unambiguous description of both the absolute binding mode of a ligand  $L_1$  in the protein binding pocket and the relative binding mode of  $L_1$  with respect to a reference ligand  $L_2$ . The correctness of the absolute binding mode of  $L_1$  in a docking model can be evaluated by calculating the quaternion that describes the rotation of  $L_1$  in the protein/ $L_1$  complex model with respect to  $L_1$  in the crystal structure of the protein/ $L_1$  complex. The correctness of the relative orientation of  $L_1$  with respect to  $L_2$  in the complex models pair protein/ $L_1$  and protein/ $L_2$  is obtained by comparing the quaternions that characterize the rotations of both  $L_1$  and  $L_2$  in the docking models with respect to  $L_1$  and  $L_2$  in the crystal structures of the protein/ $L_1$  and protein/ $L_2$  complexes. For example, in two protein/ $L_1$  and protein/ $L_2$  complex models, let  $L_1$  and  $L_2$  be both rotated by  $42^\circ$  around the same axis with respect to the orientations observed in the crystal structures of the protein/ $L_1$  and protein/ $L_2$  complexes. In this case the absolute binding mode of both  $L_1$  and  $L_2$  would be incorrect, but the relative binding mode of the two ligands, namely the ligand superposition, would be correct. In other words, if one pose of  $L_1^{i \in [0;4636]}$  is characterized by the same quaternion as one pose of  $L_2^{j \in [0;4758]}$ , the complex pair formed by combining these two poses allows the correct ligand superposition. The two quaternions describing the two binding poses  $L_1^i$  and  $L_2^j$  can be defined by five parameters  $(\theta_1^i, \theta_2^j, \mathbf{q}_1^i, \mathbf{q}_2^j, s)$  where  $\mathbf{q}_1^i$  and  $\mathbf{q}_2^j$  represent the two axis of rotation for  $L_1$  and  $L_2$ , respectively,  $\theta_1^i$  and  $\theta_2^j$  the two corresponding angles of rotation, and  $s$  is the shift between the center of mass of the two ligands.

We define two functions:

$$f_1 = (\theta_1^i - \theta_2^j) \cdot (1 - 0.7 \cdot \cos^2(\mathbf{q}_1^i \cdot \mathbf{q}_2^j)) \bmod(360^\circ) \quad \text{Eq. S1}$$

$$f_2 = \theta_{1,2}^{i,j} \cdot (1 - \cos^2(\mathbf{q}_1^i \cdot \mathbf{q}_2^j))$$

The function  $f_1$  allows different values of  $\Delta\theta = \theta_1^i - \theta_2^j$  in dependence of the relative orientations of the axis  $\mathbf{q}_1^i$  and  $\mathbf{q}_2^j$ . In practice we allow a larger value of  $\Delta\theta$  when the two axis  $\mathbf{q}_1^i$  and  $\mathbf{q}_2^j$  are parallel and a lower value when the two axis are perpendicular. The function  $f_2$  ensures that when the two axes are perpendicular ( $\cos(\mathbf{q}_1^i \cdot \mathbf{q}_2^j) \approx 0$ ) and  $\Delta\theta \approx 0$ , the rotation angles  $\theta_1^i$  and  $\theta_2^j$  are restricted to low values. The superposition of two binding poses of  $L_1$  and  $L_2$  was considered correct when:

$$f_1 \leq 29^\circ$$

$$f_2 \leq 17^\circ$$

$$s \leq 1 \text{ \AA}$$

Eq. S2

The limits of  $29^\circ$  and  $17^\circ$  were optimized empirically by visual inspection of the ligand superposition. The condition on the shift  $s$  ensured that the two ligands occupy the same binding pocket in the docked complexes.

## Supporting Figures

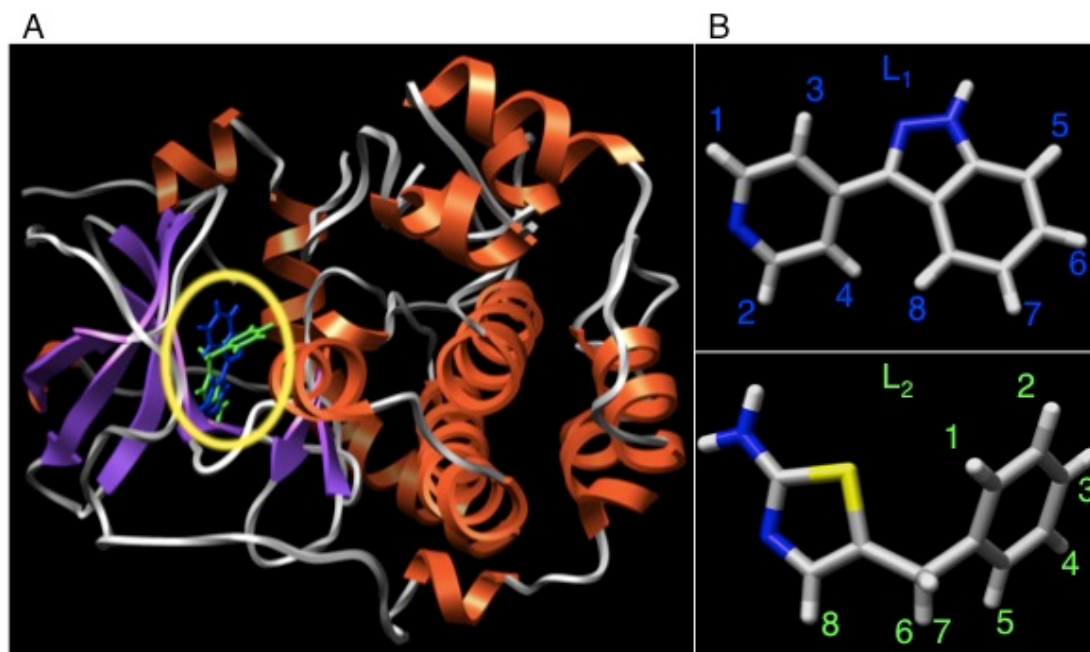

**Figure S1** Superimposition of the crystal structures (panel A) of the protein kinase A (PKA) in complex with L<sub>1</sub> and L<sub>2</sub> (panel B). The crystal structures are from 3DNE.pdb and 3DND.pdb. The yellow circle indicates the ATP binding pocket, where L<sub>1</sub> and L<sub>2</sub> bind competitively.

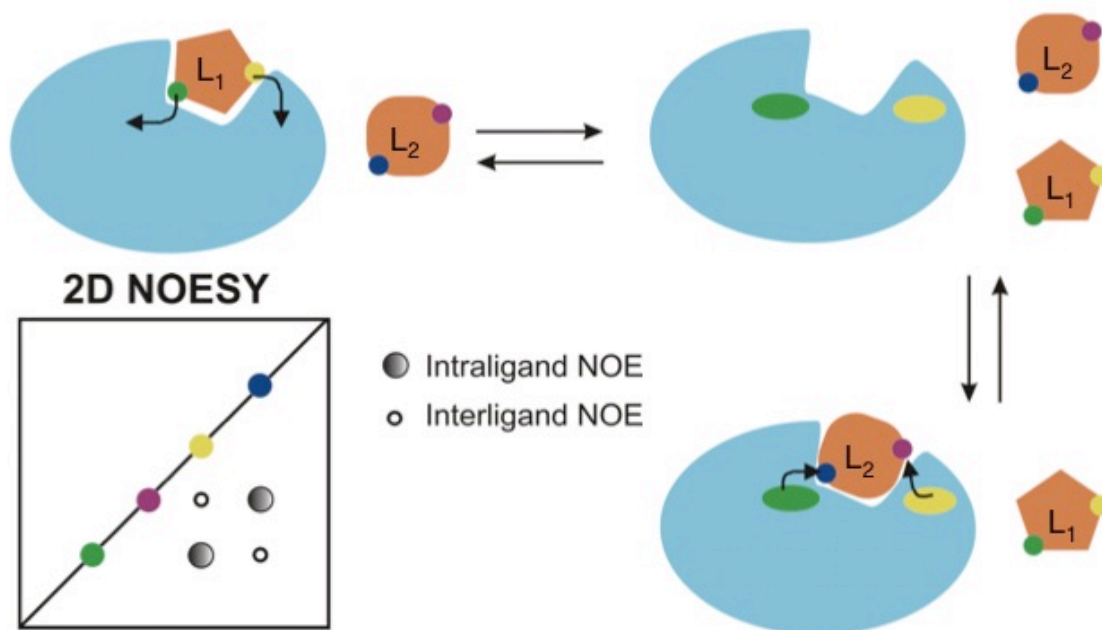

**Figure S2.** Schematic representation of the principle of the INPHARMA NOEs. At the beginning of the NOESY mixing time L<sub>1</sub> binds to the receptor and its proton H<sub>L1</sub> (yellow/green) transfers magnetization to the proton of the receptor H<sub>r</sub> (yellow/green). Being L<sub>1</sub> a weak binder, it dissociates from the receptor during the NOESY mixing time and leaves the binding pocket free for L<sub>2</sub> to occupy it. At this point the magnetization deposited on H<sub>r</sub> by the H<sub>L1</sub> proton (yellow/green) can be transferred to the H<sub>L2</sub> proton of L<sub>2</sub> (purple/blue). This process results in a spin-diffusion mediated NOE peak between H<sub>L1</sub> (yellow/green) and H<sub>L2</sub> (purple/blue).

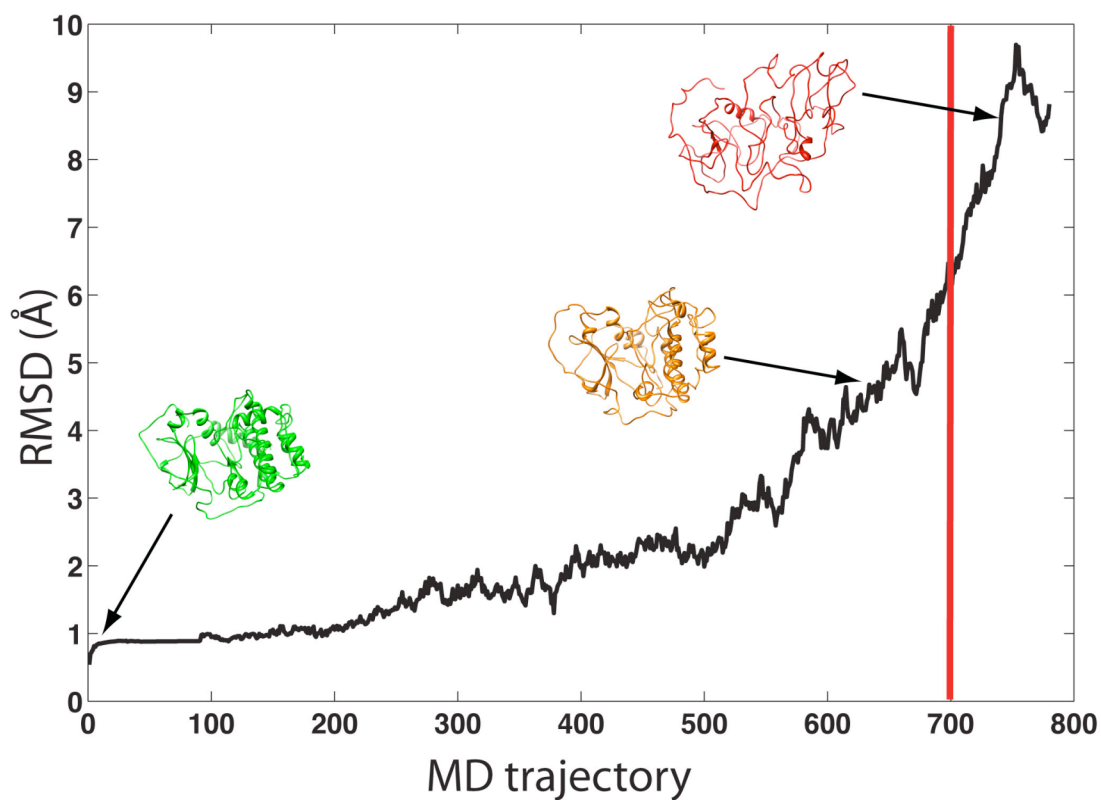

**Figure S3.** RMSD values of the ligand binding pocket of the protein PKA from the crystal structure of 3DNE.pdb along the MD trajectory. The x-axis represents the MD trajectory and each unit corresponds to one snapshot (780 total snapshots). The vertical red line delimitates the protein models retained for docking (~ 700). Structures beyond this line are discarded as the protein starts unfolding. Three structures are depicted on the graph to show the evolution of the protein along the trajectory.

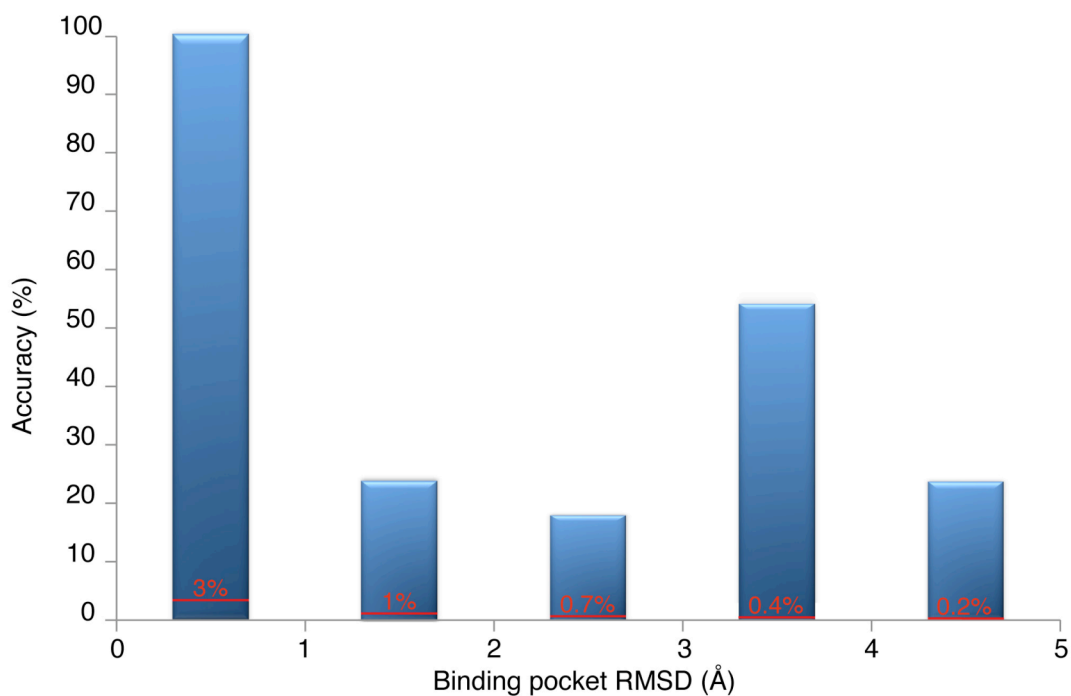

**Figure S4.** Accuracy of the INPHARMA predictions as a function of the quality of the receptor structure. The x-axis represents the (protein only) binding pocket RMSD of the receptor models used in the docking from the crystallographic structure of PKA in the complexes PKA/L<sub>1</sub> (3DNE pdb). The accuracy on the y axis is defined as the number of complex pairs reproducing the correct ligands superposition (relative binding mode of L<sub>1</sub> and L<sub>2</sub>) divided by the total number of pairs selected by INPHARMA. The numbers over each bar in red represent the accuracy before applying the INPHARMA score. In this case the accuracy is the number of the complex pairs showing the correct ligands superposition divided by the total number of complex pairs selected by the energy function of the docking program. The docking for this dataset was performed by GLIDE.

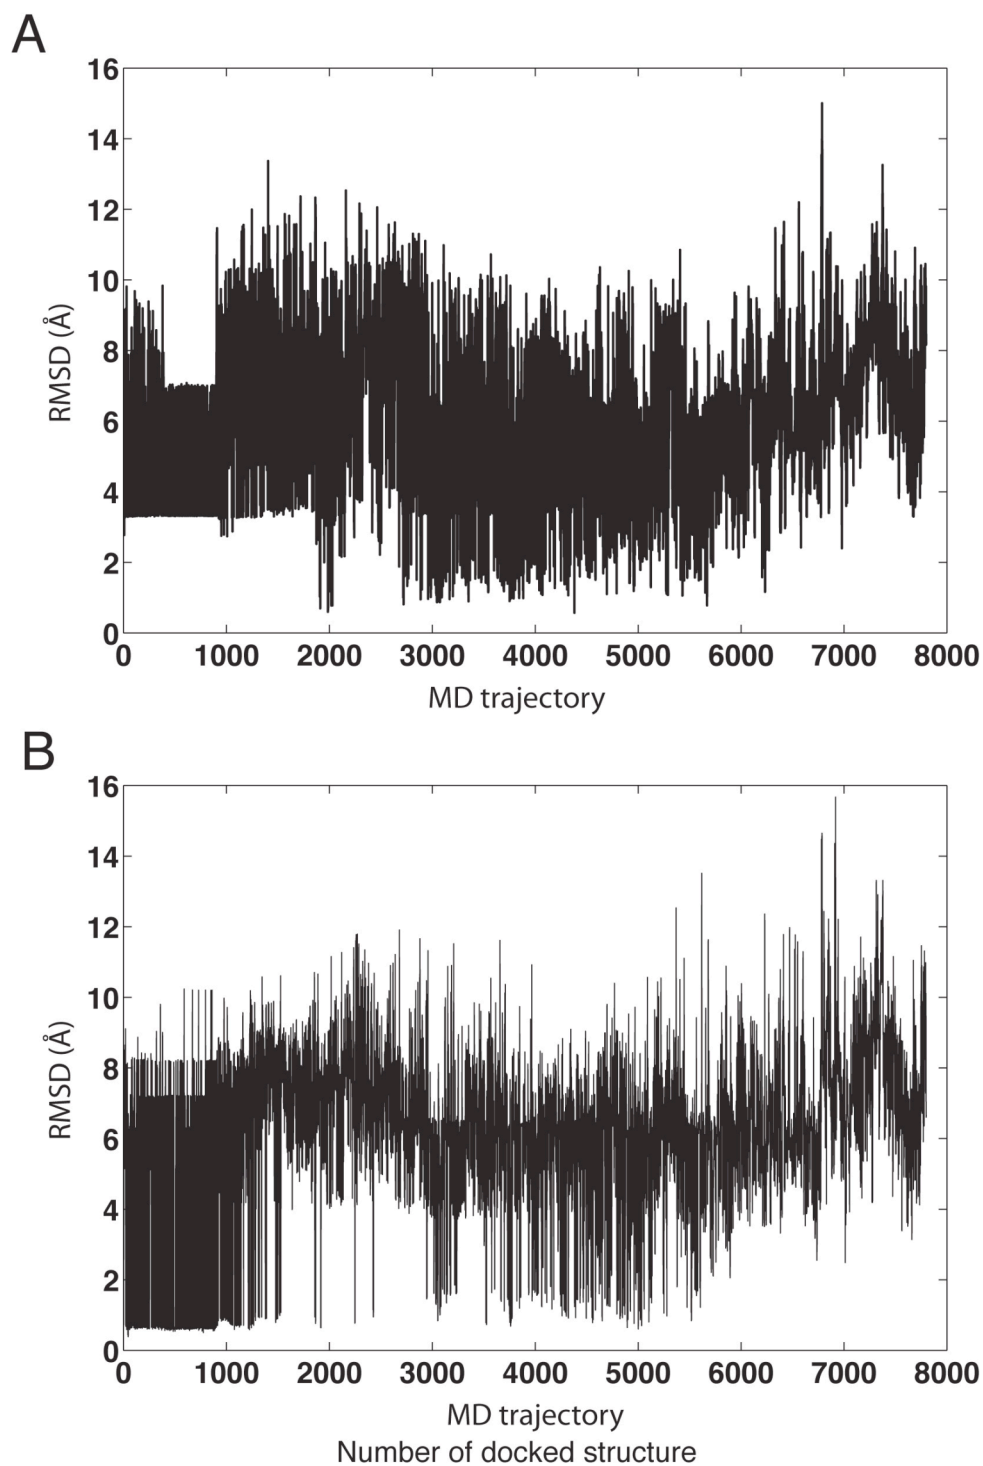

**Figure S5.** Representation of the quality of the docking poses measured by the ligand RMSD to the native binding mode found in the crystal structures (1DNE.pdb and 1DND.pdb) for L<sub>1</sub> (A) and L<sub>2</sub> (B). The x-axis represents the docked binding poses generated by SURFLEX on each receptor model resulting from the free-protein MD simulation. The best 10 poses for each protein model were kept during docking, resulting in a total of 7800 complex structures for each ligand. Note that only the first 7000 complex structures were retained, corresponding to the first 700



proteins models in the MD simulation. The docking program has difficulties in docking  $L_1$  in the correct orientation (RMSD > 3 Å), especially when docking to the first 200 protein structural models (corresponding to the first 2000 docking poses).

**Table S1.** INPHARMA NOE intensities,  $I_{\text{INPHARMA}}$ , were normalized to the diagonal peak with equal  $\omega_2$  frequency at the lowest mixing time. The experimental conditions are described in the Experimental Section.

| $\omega_2$<br>L <sub>1</sub> | $\omega_1$<br>L <sub>2</sub> | $I_{\text{INPHARMA}}$ , 800 MHz |                   |
|------------------------------|------------------------------|---------------------------------|-------------------|
|                              |                              | $\tau_m = 300$ ms               | $\tau_m = 600$ ms |
| H8                           | H1,H3,H5                     | none                            | 0.0096            |
| H3,H4                        | H1,H3,H5                     | 0,0026                          | 0.0067            |
| H1,H2                        | H1,H3,H5                     | 0,0016                          | 0.0055            |
| H3,H4                        | H6,H7                        | 0,0016                          | 0.0061            |
| H5                           | H6,H7                        | none                            | 0.0048            |
| H5                           | H1,H3,H5                     | 0,0029                          | 0.0080            |
| H1,H2                        | H6,H7                        | 0,0011                          | 0.0028            |

Additional weak NOEs were measured at 900 MHz and  $\tau_m = 600$  ms. These NOEs were not used in a quantitative way, that is they did not enter the calculation of the Pearson correlation coefficient. Instead, poses were retained that showed the same ranking in magnitude as the experimental data, namely:

1.  $I_{\text{INPHARMA}}(\text{H5}(\text{L}_1), \text{H8}(\text{L}_2)) + I_{\text{INPHARMA}}(\text{H8}(\text{L}_1), \text{H8}(\text{L}_2)) < I_{\text{INPHARMA}}(\text{H1}, \text{H2}(\text{L}_1), \text{H8}(\text{L}_2)) + I_{\text{INPHARMA}}(\text{H3}, \text{H4}(\text{L}_1), \text{H8}(\text{L}_2))$
2.  $I_{\text{INPHARMA}}(\text{H5}(\text{L}_1), \text{H6}, \text{H7}(\text{L}_2)) < I_{\text{INPHARMA}}(\text{H8}(\text{L}_1), \text{H6}, \text{H7}(\text{L}_2))$
